# Supplementary material
Source: publisher figshare collection journal article supplement (https://karger.figshare.com/ndownloader/files/17504672)

**Supplementary Fig 1.** Oxygenation, respiratory parameters and the pain assessment score\* after randomization to NIV NAVA and CPAP groups.

- a.) Similar  $\text{FiO}_2$  was required to reach the aimed  $\text{SpO}_2$  levels in both treatment groups.
- b.) Breathing frequency did not differ between the groups.
- c.) CPAP pressure was equal to PEEP in NIV NAVA patients. Peak inspiratory pressure during NIV NAVA follows the Edi-signal, and was variable from time to time.
- d.) Similar NIAPAS scores were observed in both groups.

\*In the present study, the NIAPAS score was used for assessment of pain and discomfort [6].

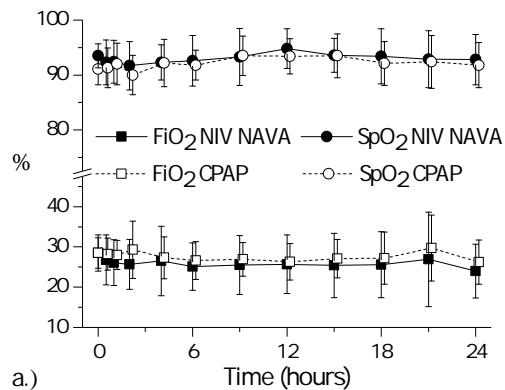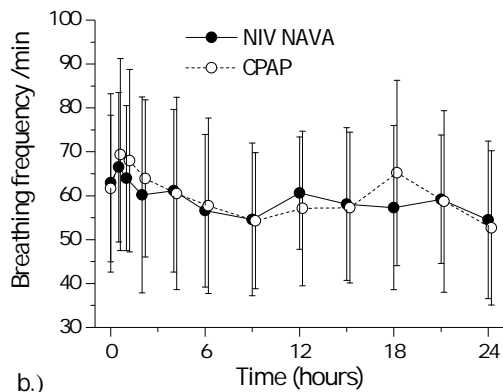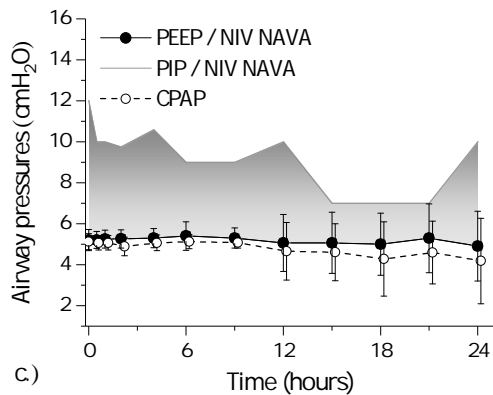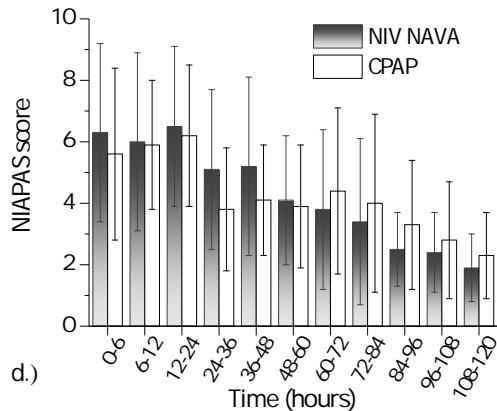

Supplement: Supplementary file 1 [file 17504672]
